# Supplementary material
Source: PubMed Central journal article supplement (PMC4476319)
Supplement: NIHMS695888-supplement-Supplemental_Table_6.pdf [file NIHMS695888-supplement-Supplemental_Table_6.pdf]

Table S6 Strains and plasmids used in this study.

| Strain or plasmid                      | Description                                                                                                 | Ref. of source |
|----------------------------------------|-------------------------------------------------------------------------------------------------------------|----------------|
| <i>S. enterica</i> serovar Typhimurium |                                                                                                             |                |
| 14028s                                 | Wild type                                                                                                   | M.J. Worley    |
| YC0224                                 | <i>rpoE</i>                                                                                                 | H. Yoon        |
| YC0284                                 | <i>hfq</i>                                                                                                  | H. Yoon        |
| LS018                                  | <i>cspA</i> -2HA                                                                                            | This study     |
| LS007                                  | <i>srfN</i> -2HA                                                                                            | This study     |
| LS006                                  | <i>hfq</i> -2HA                                                                                             | This study     |
| LS008                                  | <i>sodC2</i> -2HA                                                                                           | This study     |
| LS005                                  | <i>pspA</i> -2HA                                                                                            | This study     |
| LS020                                  | <i>rpoE cspA</i> -2HA                                                                                       | This study     |
| LS015                                  | <i>rpoE srfN</i> -2HA                                                                                       | This study     |
| LS014                                  | <i>rpoE hfq</i> -2HA                                                                                        | This study     |
| LS016                                  | <i>rpoE sodC2</i> -2HA                                                                                      | This study     |
| LS013                                  | <i>rpoE pspA</i> -2HA                                                                                       | This study     |
| Plasmid                                |                                                                                                             |                |
| pKD13-2HA                              | pKD13 derivative harboring 2HA                                                                              | H. Yoon        |
| pKD46                                  | rep <sub>pSC101</sub> <sup>ts</sup> Ap <sup>R</sup> P <sub>BAD</sub> <i>gam bet exo</i>                     | K.A.Datsenko   |
| pCP20                                  | rep <sub>pSC101</sub> <sup>ts</sup> Ap <sup>R</sup> Cm <sup>R</sup> <i>cI857</i> λP <sub>R</sub> <i>flp</i> | K.A.Datsenko   |
| pWKS30Hfq                              | P <sub>lacZ</sub> :: <i>hfq</i> /pWKS30                                                                     | H. Yoon        |
