# Supplementary material
Source: PubMed Central journal article supplement (PMC4476319)
Supplement: NIHMS695888-supplement-Supplemental_Table_7.pdf [file NIHMS695888-supplement-Supplemental_Table_7.pdf]

Table S7 List of primers used in this study.

| Primers    | Sequences (5'- end to 3'-end)                                                    | Purpose   |
|------------|----------------------------------------------------------------------------------|-----------|
| CspA-HAF1  | CGG CGC TAA GGG CCC GGC AGC TGG CAA CGT AAC CAG CCT G<br>ATT CCG GGG ATC CGT CGA | CspA-2HA  |
| CspA-HAR1  | CAT CAG GCA GGG ATT CAA AAT GCT GAG CTT TTT AAG CTT<br>A GTG TAG GCT GGA GCT GCT | CspA-2HA  |
| SrfN-HAF1  | TTT TGA AGC CGT TGC CGA AGT TTA TAA CGA TGC GAC GAA<br>A ATT CCG GGG ATC CGT CGA | SrfN-2HA  |
| SrFN-HAR1  | TTC ATG CCA GTG CCC TCG TTA TGG CGC AAT CAG AGC TTT A<br>GTG TAG GCT GGA GCT GCT | SrfN-2HA  |
| Hfq-HAF1   | GCA GGG GTC TAC TGC GCA ACA GGA CAG CGA AGA GAC TGA<br>A ATT CCG GGG ATC CGT CGA | Hfq-2HA   |
| Hfq-HAR1   | ATC CGA CGC CCC CGA CAT GGA TAA ACA GCG CGT GAA CTT A<br>GTG TAG GCT GGA GCT GCT | Hfq-2HA   |
| SodC2-HAF1 | CGG CGG CGG CGG AAT GCG TTA CGC CTG CGG CGT CAT TAA A<br>ATT CCG GGG ATC CGT CGA | SodC2-2HA |
| SodC2-HAR1 | TGG AAC AGG CTC CAG CGC AGG GAA CAC TGG CTC CGG GTT A<br>GTG TAG GCT GGA GCT GCT | SodC2-2HA |
| PspA-HAF1  | GCT GGC GCA GTT GAA AGC CAA AAT GAA GCA AGA TAA TCA<br>A ATT CCG GGG ATC CGT CGA | PspA-2HA  |
| PspA-HAR1  | TGA TGA GCG ACG GCG CGT ATC GGC GCC GCC ATT GTC ATT A<br>GTG TAG GCT GGA GCT GCT | PspA-2HA  |
